# Supplementary material for: Loss of endothelial EMCN drives tumor lung metastasis through the premetastatic niche
Source: Springer Nature journal article supplement (doi:10.1186/s12967-022-03649-4), 2022-10-02
Supplement: MOESM6 [file 23563186]

| Gene                   | Target sequence       |
|------------------------|-----------------------|
| Negative Control(shNC) | TTCTCCGAACGTGTCACGT   |
| ShEMCN1#(93325-1)      | GCGTGAAGCTTCTTACCGTTA |
| ShEMCN2#(93326-1)      | GACTCCATCATTTCAAACGTA |
| ShEMCN3#(93327-1)      | CAACACCAAACACAGAATCAT |

Primers for quantitative Real-Time PCR

| gene          | Forward                     | Reverse                       |
|---------------|-----------------------------|-------------------------------|
| hEMCN         | 5'-TGCAGGACTTTCTCCTTTTC-3'  | 5'-ATTTGTTCTGGTGGGTTTGT-3'    |
| mEMCN         | 5'-AATACCAGGCATCGTGTCACT-3' | 5'-CTGATTCTCAGTCTTGTCTGGG-3'  |
| hGAPDH        | 5'-CAAATTCATGGCACCGTCA-3'   | 5'-GGAGTGGGTGTCGCTGTTGA-3'    |
| mGAPDH        | 5'-GTGGCAAAGTGGAGATTGCC-3'  | 5'-GATGATGACCCGTTTGGCTCC-3'   |
| S100A8        | 5'-TGAGTGTCTCAGTTTGTGCAG-3' | 5'-TGTGAGATGCCACACCCACTTT-3'  |
| S100A9        | 5'-CCTCACCATATGGCTCGGAC-3'  | 5'-ACGACTGCAAGATTGGAGCA-3'    |
| MMP9          | 5'-GGACCCGAAGCGGACATTG-3'   | 5'-CGTCGTCGAAATGGGCATCT-3'    |
| TGF- $\beta$  | 5'-GAGCCCGAAGCGGACTACTA-3'  | 5'-TGGTTTTCTCATAGATGGCGTTG-3' |
| CXCL1         | 5'-ACCGAAGTCATAGCCCACT-3'   | 5'-GTGCCATCAGAGCAGTCTGT-3'    |
| CXCL3         | 5'-CAGCCACACTCCAGCCTA-3'    | 5'-CACAACAGCCCCTGTAGC-3'      |
| TNF- $\alpha$ | 5'-CAGGCGGTGCCTATGTCTC-3'   | 5'-CGATCACCCCGAAGTTCAGTAG-3'  |
