# Supplementary material for: Loss of endothelial EMCN drives tumor lung metastasis through the premetastatic niche
Source: Springer Nature journal article supplement (doi:10.1186/s12967-022-03649-4), 2022-10-02
Supplement: MOESM7 [file 23563186]

Quality statistic of different samples

| Sample      | RawReads | RawBases | ValidBases | Q30    | GC     |
|-------------|----------|----------|------------|--------|--------|
| EMCN-L1     | 48.88M   | 7.33G    | 91.23%     | 90.57% | 49.75% |
| EMCN-L2     | 49.37M   | 7.41G    | 91.53%     | 90.37% | 49.75% |
| EMCN-L3     | 50.97M   | 7.65G    | 91.86%     | 90.50% | 49.44% |
| EMCN-LLC-L1 | 49.78M   | 7.47G    | 91.63%     | 90.00% | 49.32% |
| EMCN-LLC-L2 | 51.27M   | 7.69G    | 91.36%     | 89.66% | 49.54% |
| EMCN-LLC-L3 | 47.28M   | 7.09G    | 90.90%     | 89.82% | 49.51% |
| WT-L1       | 48.30M   | 7.25G    | 91.38%     | 90.29% | 49.03% |
| WT-L2       | 50.10M   | 7.51G    | 91.46%     | 90.54% | 49.20% |
| WT-L3       | 51.02M   | 7.65G    | 91.64%     | 90.28% | 48.75% |
| WT-LLC-L1   | 47.67M   | 7.15G    | 91.85%     | 90.15% | 48.77% |
| WT-LLC-L2   | 48.66M   | 7.30G    | 91.68%     | 90.17% | 49.39% |
| WT-LLC-L3   | 48.06M   | 7.21G    | 91.19%     | 89.51% | 49.06% |
| Con313      | 50.01M   | 7.52G    | 93.23%     | 94.12% | 48.90% |
| shEMCN      | 46.02M   | 6.90G    | 93.37%     | 93.84% | 49.00% |

Sequencing coverage of different samples

| Sample      | Seqencing coverage |
|-------------|--------------------|
| EMCN-L1     | 6.69G              |
| EMCN-L2     | 6.78G              |
| EMCN-L3     | 7.02G              |
| EMCN-LLC-L1 | 6.84G              |
| EMCN-LLC-L2 | 7.03G              |
| EMCN-LLC-L3 | 6.45G              |
| WT-L1       | 6.62G              |
| WT-L2       | 6.87G              |
| WT-L3       | 7.01G              |
| WT-LLC-L1   | 6.57G              |
| WT-LLC-L2   | 6.69G              |
| WT-LLC-L3   | 6.57G              |
| Con313      | 7.01G              |
| shEMCN      | 6.45G              |
